# Supplementary material for: White matter alterations in MR-negative temporal and frontal lobe epilepsy using fixel-based analysis
Source: PubMed Central journal article supplement (PMC9807578; doi:10.1038/s41598-022-27233-4), 2023-01-02
Supplement: 41598_2022_27233_MOESM1_ESM.pdf [file 41598_2022_27233_MOESM1_ESM.pdf]

# **White Matter Alterations in MR-Negative Temporal and Frontal Lobe Epilepsy Using Fixel-Based Analysis**

**Bartoňová Michaela, Tournier Jacques-Donald, Bartoň Marek, Říha Pavel, Vojtíšek Lubomír, Mareček Radek, Doležalová Irena, Rektor Ivan**

Supplementary Material

**Table S1:** List of MRI sequences measured for evaluation of (non)lesionality of patients. TR = repetition time; TE = echo time; TI = inversion time; ms = milliseconds; mm = millimeters; deg = degrees.

| MRI sequence                                                                 | No of slices | TR [ms] | TE [ms] | Voxel size [mm <sup>3</sup> ] | Flip angle [deg]                                              | Notes                                                                            |
|------------------------------------------------------------------------------|--------------|---------|---------|-------------------------------|---------------------------------------------------------------|----------------------------------------------------------------------------------|
| <b>T2 – weighted</b> (turbo spin-echo)                                       | Transversal  | 6100    | 105     | 0.49x0.49x3                   | 150                                                           |                                                                                  |
| <b>T2* – weighted</b> (gradient-echo)                                        | Transversal  | 852     | 19.9    | 0.69x0.69x3.9                 | 20                                                            | transversal slices used to depict hemorrhage, calcification, and iron deposition |
| <b>T1 – weighted</b> (inversion recovery)                                    | Transversal  | 2500    | 11      | 0.69x0.69x3.3                 | 150                                                           |                                                                                  |
| <b>T2 – weighted</b> (turbo inversion recovery magnitude)                    | Transversal  | 5390    | 81      | 0.69x0.69x3.6                 | 150                                                           | Long T1 components suppressed                                                    |
| <b>T1 – weighted</b> (inversion recovery)                                    | Coronal      | 2900    | 10      | 0.5x0.5x2.2                   | 150                                                           |                                                                                  |
| <b>T2 – weighted</b> (turbo inversion recovery magnitude)                    | Coronal      | 9000    | 81      | 0.69x0.69x3.6                 | 150                                                           |                                                                                  |
| <b>T2 – weighted</b> (fast spin-echo)                                        | Para-coronal | 8000    | 52      | 0.39x0.39x2                   | 150                                                           | Slices perpendicular to hippocampus                                              |
| <b>T1 – weighted</b> (inversion recovery prepared 3D gradient-echo)          | Sagittal     | 2300    | 2.33    | 1x1x1                         | 8                                                             | TI = 900 ms                                                                      |
| <b>T1 – weighted</b> (inversion recovery prepared 3D dual gradient-echo)     | Sagittal     | 5000    | 2.97    | 1x1x1                         | (Dual flip angle)<br>1 <sup>st</sup> : 4; 2 <sup>nd</sup> : 5 | TI_1 = 766 ms<br>TI_2 = 2500 ms                                                  |
| <b>T2 – weighted</b> (inversion recovery prepared 3D fast (turbo) spin-echo) | Sagittal     | 6000    | 387     | 1x1x1                         | –                                                             | TI = 1900 ms                                                                     |

## Supplementary Methods

### Description of the patient inclusion process:

The dataset for the current study was selected from a cohort recruited as part of a larger epilepsy project involving 154 epilepsy patients (see Figure S1) and 115 healthy control subjects (controls were excluded only if DWI data were missing or the acquisition was not finished, resulting in 100 subjects). From 154 patients, 40 were successfully resected (ILAE  $\leq 4$ ) and had at least a 12-month outcome from the surgery; the remaining 104 patients were either not yet resected, the surgery ended with ILAE outcome  $>4$ , or the follow up was shorter than 12 months. Out of 40 resected patients, 5 did not have DWI data or the acquisition was interrupted. From 35 patients, 30 were resected in the frontal or temporal lobe; the remaining 5 were resected in other areas (insular, parietal, or occipital). From 30 FLE/TLE patients, 3 were diagnosed as lesional (non-lesionality was first assessed according to 1.5T MRI data and then evaluated again using a 3T experimental MRI machine). The last exclusion resulted in 5 patients being omitted from the study: one patient was measured on a different MRI machine than the rest of our study group and the healthy controls group; one was excluded on the medical advice of his healthcare provider, as he did not follow the prescribed post-operative treatment regimen and therefore his outcome cannot be considered as a result of the operation; and three cases were excluded from the study for structural alterations incompatible with the methods used (two patients had substantial structural malformations not associated with epilepsy; one patient had a previous resection that resulted in structural changes).

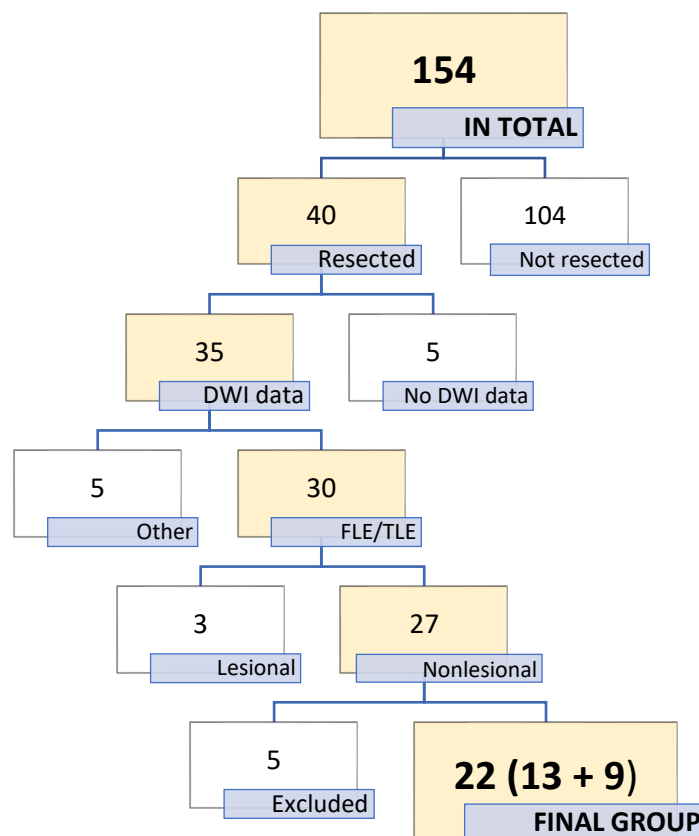

**Figure S1:** Overview of the whole initial cohort (marked as 'In total' in the figure) and the selection process resulting in the cohort used in the analyses (marked as 'Final group' in the figure). DWI = diffusion weighted imaging; FLE = frontal lobe epilepsy; TLE = temporal lobe epilepsy

**Table S2:** Overview of the demographic data of subject groups used for building a template and for statistical comparison. HC = healthy controls; SD = standard deviation; M = male; F = female; TLE = temporal lobe epilepsy; FLE = frontal lobe epilepsy

| <b>Template</b>  |              |                     |                         |
|------------------|--------------|---------------------|-------------------------|
|                  | Gender [M/F] | Age [ $\pm$ SD]     | Flip [flipped/original] |
| <b>HC (N=9)</b>  | 6/3          | 28.67 [ $\pm$ 6.87] | 9/9                     |
| <b>FLE (N=9)</b> | 7/2          | 27.89 [ $\pm$ 7.27] | 9/9                     |
| <b>TLE (N=9)</b> | 5/4          | 29.89 [ $\pm$ 6.51] | 9/9                     |

For gender:  $\chi^2 = 1$ ;  $p = 0.6065$

For age: HC vs. FLE: 2-tailed  $t$ -stats = 0.2332;  $p = 0.8186$ ; HC vs. TLE: 2-tailed  $t$ -stats = -0.3873;  $p = 0.7036$ ; FLE vs. TLE: 2-tailed  $t$ -stats = -0.6149;  $p = 0.5473$

For flip:  $\chi^2 = 0$ ;  $p = 1$

| <b>Statistical comparison FLE vs. HC</b> |              |                     |                         |
|------------------------------------------|--------------|---------------------|-------------------------|
|                                          | Gender [M/F] | Age [ $\pm$ SD]     | Flip [flipped/original] |
| <b>FLE (N=9)</b>                         | 7/2          | 27.89 [ $\pm$ 7.27] | 3/6                     |
| <b>HC (N=100)</b>                        | 52/48        | 31.65 [ $\pm$ 8.39] | 33/67                   |

For gender:  $\chi^2 = 2.2097$ ;  $p = 0.1371$

For age: 2-tailed  $t$ -stats = -1.3001;  $p = 0.1963$

| <b>Statistical comparison TLE vs. HC</b> |              |                     |                         |
|------------------------------------------|--------------|---------------------|-------------------------|
|                                          | Gender [M/F] | Age [ $\pm$ SD]     | Flip [flipped/original] |
| <b>TLE (N=14)</b>                        | 6/7          | 34.92 [ $\pm$ 9.81] | 3/10                    |
| <b>HC (N=100)</b>                        | 52/48        | 31.65 [ $\pm$ 8.39] | 23/77                   |

For gender:  $\chi^2 = 0.1574$ ;  $p = 0.6916$

For age: 2-tailed  $t$ -stats = 1.2975;  $p = 0.1971$

For flip:  $\chi^2 = 0$ ;  $p = 0.9951$

**Table S3:** List of WM tracts used for tractogram segmentation employing the TractSeg approach.

| <b>ID</b> | <b>ACRONYM</b> | <b>NAME OF A TRACT</b>                       |
|-----------|----------------|----------------------------------------------|
| 0         | AF_left        | Arcuate fasciculus (right)                   |
| 1         | AF_right       | Arcuate fasciculus (left)                    |
| 2         | ATR_left       | Anterior thalamic radiation                  |
| 3         | ATR_right      | Anterior thalamic radiation                  |
| 4         | CA             | Anterior commissure                          |
| 5         | CC_1           | Rostrum of corpus callosum                   |
| 6         | CC_2           | Genu of corpus callosum                      |
| 7         | CC_3           | Rostral body of corpus callosum              |
| 8         | CC_4           | Anterior midbody of corpus callosum          |
| 9         | CC_5           | Posterior midbody of corpus callosum         |
| 10        | CC_6           | Isthmus of corpus callosum                   |
| 11        | CC_7           | Splenium of corpus callosum                  |
| 12        | CG_left        | Cingulum bundle (left)                       |
| 13        | CG_right       | Cingulum bundle (right)                      |
| 14        | CST_left       | Corticospinal tract (left)                   |
| 15        | CST_right      | Corticospinal tract (right)                  |
| 16        | MLF_left       | Middle longitudinal fasciculus (left)        |
| 17        | MLF_right      | Middle longitudinal fasciculus (right)       |
| 18        | FPT_left       | Fronto-pontine tract (left)                  |
| 19        | FPT_right      | Fronto-pontine tract (right)                 |
| 20        | FX_left        | Fornix (left)                                |
| 21        | FX_right       | Fornix (right)                               |
| 22        | ICP_left       | Inferior cerebellar peduncle                 |
| 23        | ICP_right      | Inferior cerebellar peduncle (right)         |
| 24        | IFO_left       | Inferior occipito-frontal fasciculus (left)  |
| 25        | IFO_right      | Inferior occipito-frontal fasciculus (right) |
| 26        | ILF_left       | Inferior longitudinal fasciculus (left)      |
| 27        | ILF_right      | Inferior longitudinal fasciculus (right)     |
| 28        | MCP            | Middle cerebellar peduncle                   |
| 29        | OR_left        | Optic radiation (left)                       |
| 30        | OR_right       | Optic radiation (right)                      |
| 31        | POPT_left      | Parieto-occipito-pontine tract (left)        |
| 32        | POPT_right     | Parieto-occipito-pontine tract(right)        |
| 33        | SCP_left       | Superior cerebellar peduncle (left)          |
| 34        | SCP_right      | Superior cerebellar peduncle (right)         |
| 35        | SLF_I_left     | Superior longitudinal fasciculus I           |
| 36        | SLF_I_right    | Superior longitudinal fasciculus I           |
| 37        | SLF_II_left    | Superior longitudinal fasciculus II          |
| 38        | SLF_II_right   | Superior longitudinal fasciculus II          |
| 39        | SLF_III_left   | Superior longitudinal fasciculus III         |
| 40        | SLF_III_right  | Superior longitudinal fasciculus III         |
| 41        | STR_left       | Superior thalamic radiation                  |
| 42        | STR_right      | Superior thalamic radiation                  |
| 43        | UF_left        | Uncinate fasciculus                          |
| 44        | UF_right       | Uncinate fasciculus                          |
| 45        | CC             | Corpus callosum                              |
| 46        | T_PREF_left    | Thalamo-prefrontal projection (left)         |
| 47        | T_PREF_right   | Thalamo-prefrontal projection (right)        |
| 48        | T_PREM_left    | Thalamo-premotor projection (left)           |

|    |                |                                           |
|----|----------------|-------------------------------------------|
| 49 | T_PREM_right   | Thalamo-premotor projection (right)       |
| 50 | T_PREC_left    | Thalamo-precentral projection (left)      |
| 51 | T_PREC_right   | Thalamo-precentral projection (right)     |
| 52 | T_POSTC_left   | Thalamo-postcentral projection (left)     |
| 53 | T_POSTC_right  | Thalamo-postcentral projection (right)    |
| 54 | T_PAR_left     | Thalamo-parietal projection (left)        |
| 55 | T_PAR_right    | Thalamo-parietal projection (right)       |
| 56 | T_OCC_left     | Thalamo-occipital projection (left)       |
| 57 | T_OCC_right    | Thalamo-occipital projection (right)      |
| 58 | ST_FO_left     | Striato-fronto-orbital projection(left)   |
| 59 | ST_FO_right    | Striato-fronto-orbital projection (right) |
| 60 | ST_PREF_left   | Striato-prefrontal projection (left)      |
| 61 | ST_PREF_right  | Striato-prefrontal projection (right)     |
| 62 | ST_PREM_left   | Striato-premotor projection (left)        |
| 63 | ST_PREM_right  | Striato-premotor projection (right)       |
| 64 | ST_PREC_left   | Striato-precentral projection (left)      |
| 65 | ST_PREC_right  | Striato-precentral projection (right)     |
| 66 | ST_POSTC_left  | Striato-postcentral projection (left)     |
| 67 | ST_POSTC_right | Striato-postcentral projection (right)    |
| 68 | ST_PAR_left    | Striato-parietal projection (left)        |
| 69 | ST_PAR_right   | Striato-parietal projection (right)       |
| 70 | ST_OCC_left    | Striato-occipital projection (left)       |
| 71 | ST_OCC_right   | Striato-occipital projection (right)      |

For a more detailed demonstration of the data in areas of significant between-group differences, see Figure S2 and the following overview of the results (with values representing group mean  $\pm$  standard deviation):

- A) FLE<HCs, parameter log(FC) – FLE:  $-0.0021 \pm 0.13$ ; HC:  $0.167 \pm 0.11$
- B) TLE<HC, parameter FD – TLE:  $0.45 \pm 0.021$ ; HC:  $0.52 \pm 0.02$
- C) TLE<HCs, parameter log(FC) – TLE:  $-0.068 \pm 0.078$ ; HC:  $0.05 \pm 0.058$
- D) TLE<HCs, parameter FDC – TLE:  $0.53 \pm 0.046$ ; HC:  $0.63 \pm 0.044$

Data are adjusted for the same regressors as in whole-brain analyses, i.e. age, gender, and mirror-wise flipping.

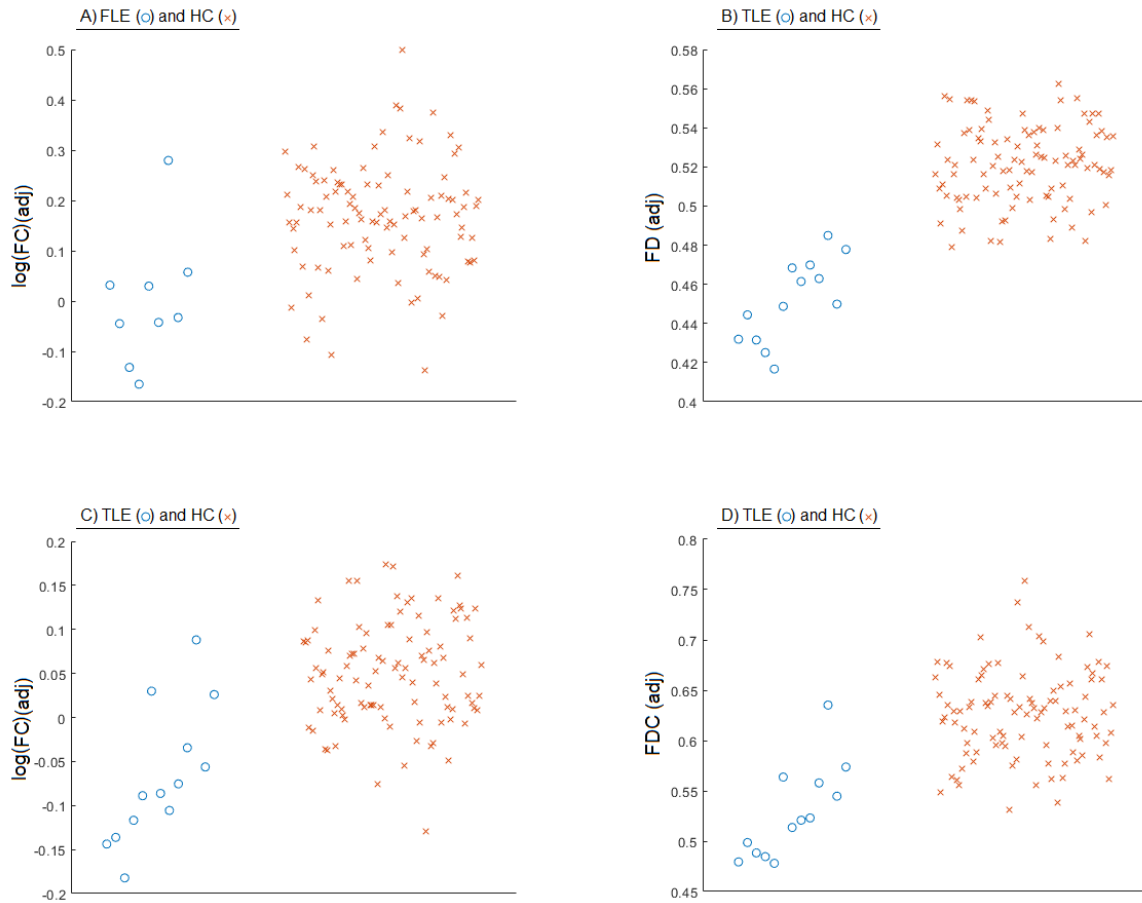

**Figure S2:** Overview of subject-specific data – mean value (one per subject) from areas with significant between-group differences in whole-brain analysis: A) FLE<HCs, parameter log(FC); B) TLE<HC, parameter FD; C) TLE<HCs, parameter log(FC); D) TLE<HCs, parameter FDC. HC = healthy controls; TLE = temporal lobe epilepsy; FLE = frontal lobe epilepsy; FD = fibre density; FC = fibre cross-section; FDC = fibre density and cross-section; adj =data adjusted for regressors (age, gender, and mirror-wise flipping).
